# Supplementary material for: Use of routine healthcare data in randomised implementation trials: a methodological mixed-methods systematic review
Source: PubMed Central journal article supplement (PMC10544368; doi:10.1186/s13012-023-01300-4), 2023-10-02

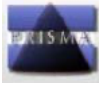

## Additional file 1. PRISMA 2020 Checklist

| Section and Topic             | Item # | Checklist item                                                                                                                                                                                                                                                                                       | Location where item is reported                        |
|-------------------------------|--------|------------------------------------------------------------------------------------------------------------------------------------------------------------------------------------------------------------------------------------------------------------------------------------------------------|--------------------------------------------------------|
| <b>TITLE</b>                  |        |                                                                                                                                                                                                                                                                                                      |                                                        |
| Title                         | 1      | Identify the report as a systematic review.                                                                                                                                                                                                                                                          | Title                                                  |
| <b>ABSTRACT</b>               |        |                                                                                                                                                                                                                                                                                                      |                                                        |
| Abstract                      | 2      | See the PRISMA 2020 for Abstracts checklist.                                                                                                                                                                                                                                                         | Abstract                                               |
| <b>INTRODUCTION</b>           |        |                                                                                                                                                                                                                                                                                                      |                                                        |
| Rationale                     | 3      | Describe the rationale for the review in the context of existing knowledge.                                                                                                                                                                                                                          | Background, paragraph 1-2                              |
| Objectives                    | 4      | Provide an explicit statement of the objective(s) or question(s) the review addresses.                                                                                                                                                                                                               | Background, paragraph 3                                |
| <b>METHODS</b>                |        |                                                                                                                                                                                                                                                                                                      |                                                        |
| Eligibility criteria          | 5      | Specify the inclusion and exclusion criteria for the review and how studies were grouped for the syntheses.                                                                                                                                                                                          | Definitions, inclusion and exclusion criteria, table 1 |
| Information sources           | 6      | Specify all databases, registers, websites, organisations, reference lists and other sources searched or consulted to identify studies. Specify the date when each source was last searched or consulted.                                                                                            | Systematic searches                                    |
| Search strategy               | 7      | Present the full search strategies for all databases, registers and websites, including any filters and limits used.                                                                                                                                                                                 | Additional file 2                                      |
| Selection process             | 8      | Specify the methods used to decide whether a study met the inclusion criteria of the review, including how many reviewers screened each record and each report retrieved, whether they worked independently, and if applicable, details of automation tools used in the process.                     | Data screening                                         |
| Data collection process       | 9      | Specify the methods used to collect data from reports, including how many reviewers collected data from each report, whether they worked independently, any processes for obtaining or confirming data from study investigators, and if applicable, details of automation tools used in the process. | Data extraction and analysis                           |
| Data items                    | 10a    | List and define all outcomes for which data were sought. Specify whether all results that were compatible with each outcome domain in each study were sought (e.g. for all measures, time points, analyses), and if not, the methods used to decide which results to collect.                        | Data extraction and analysis                           |
|                               | 10b    | List and define all other variables for which data were sought (e.g. participant and intervention characteristics, funding sources). Describe any assumptions made about any missing or unclear information.                                                                                         | Data extraction and analysis, table 1                  |
| Study risk of bias assessment | 11     | Specify the methods used to assess risk of bias in the included studies, including details of the tool(s) used, how many reviewers assessed each study and whether they worked independently, and if applicable, details of automation tools used in the process.                                    | N/A                                                    |
| Effect measures               | 12     | Specify for each outcome the effect measure(s) (e.g. risk ratio, mean difference) used in the synthesis or presentation of results.                                                                                                                                                                  | N/A, Narrative synthesis                               |
| Synthesis methods             | 13a    | Describe the processes used to decide which studies were eligible for each synthesis (e.g. tabulating the study intervention characteristics and comparing against the planned groups for each synthesis (item #5)).                                                                                 | Mixed method analysis                                  |
|                               | 13b    | Describe any methods required to prepare the data for presentation or synthesis, such as handling of missing summary statistics, or data conversions.                                                                                                                                                | Analysis and synthesis of                              |

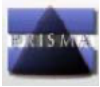

## Additional file 1\_PRISMA 2020 Checklist

| Section and Topic             | Item # | Checklist item                                                                                                                                                                                                                                              | Location where item is reported                                             |
|-------------------------------|--------|-------------------------------------------------------------------------------------------------------------------------------------------------------------------------------------------------------------------------------------------------------------|-----------------------------------------------------------------------------|
|                               |        |                                                                                                                                                                                                                                                             | findings                                                                    |
|                               | 13c    | Describe any methods used to tabulate or visually display results of individual studies and syntheses.                                                                                                                                                      | Descriptive tables/figures                                                  |
|                               | 13d    | Describe any methods used to synthesize results and provide a rationale for the choice(s). If meta-analysis was performed, describe the model(s), method(s) to identify the presence and extent of statistical heterogeneity, and software package(s) used. | Data extraction and analysis                                                |
|                               | 13e    | Describe any methods used to explore possible causes of heterogeneity among study results (e.g. subgroup analysis, meta-regression).                                                                                                                        | N/A, Narrative synthesis                                                    |
|                               | 13f    | Describe any sensitivity analyses conducted to assess robustness of the synthesized results.                                                                                                                                                                | N/A                                                                         |
| Reporting bias assessment     | 14     | Describe any methods used to assess risk of bias due to missing results in a synthesis (arising from reporting biases).                                                                                                                                     | N/A                                                                         |
| Certainty assessment          | 15     | Describe any methods used to assess certainty (or confidence) in the body of evidence for an outcome.                                                                                                                                                       | N/A                                                                         |
| <b>RESULTS</b>                |        |                                                                                                                                                                                                                                                             |                                                                             |
| Study selection               | 16a    | Describe the results of the search and selection process, from the number of records identified in the search to the number of studies included in the review, ideally using a flow diagram.                                                                | Results section; PRISMA flow diagram                                        |
|                               | 16b    | Cite studies that might appear to meet the inclusion criteria, but which were excluded, and explain why they were excluded.                                                                                                                                 | PRISMA flow diagram, additional file 2                                      |
| Study characteristics         | 17     | Cite each included study and present its characteristics.                                                                                                                                                                                                   | Study characteristics, Table 2,3,4, Figure 2,3,4,5                          |
| Risk of bias in studies       | 18     | Present assessments of risk of bias for each included study.                                                                                                                                                                                                | N/A                                                                         |
| Results of individual studies | 19     | For all outcomes, present, for each study: (a) summary statistics for each group (where appropriate) and (b) an effect estimate and its precision (e.g. confidence/credible interval), ideally using structured tables or plots.                            | Descriptive statistics and narrative synthesis, Table 2,3,4, Figure 2,3,4,5 |
| Results of syntheses          | 20a    | For each synthesis, briefly summarise the characteristics and risk of bias among contributing studies.                                                                                                                                                      | Study characteristics sections                                              |



## Additional file 1\_PRISMA 2020 Checklist

| Section and Topic                              | Item # | Checklist item                                                                                                                                                                                                                                                                       | Location where item is reported                                |
|------------------------------------------------|--------|--------------------------------------------------------------------------------------------------------------------------------------------------------------------------------------------------------------------------------------------------------------------------------------|----------------------------------------------------------------|
|                                                | 20b    | Present results of all statistical syntheses conducted. If meta-analysis was done, present for each the summary estimate and its precision (e.g. confidence/credible interval) and measures of statistical heterogeneity. If comparing groups, describe the direction of the effect. | N/A                                                            |
|                                                | 20c    | Present results of all investigations of possible causes of heterogeneity among study results.                                                                                                                                                                                       | N/A                                                            |
|                                                | 20d    | Present results of all sensitivity analyses conducted to assess the robustness of the synthesized results.                                                                                                                                                                           | N/A                                                            |
| Reporting biases                               | 21     | Present assessments of risk of bias due to missing results (arising from reporting biases) for each synthesis assessed.                                                                                                                                                              | N/A                                                            |
| Certainty of evidence                          | 22     | Present assessments of certainty (or confidence) in the body of evidence for each outcome assessed.                                                                                                                                                                                  | N/A, this is a review of methodology, not a review of findings |
| <b>DISCUSSION</b>                              |        |                                                                                                                                                                                                                                                                                      |                                                                |
| Discussion                                     | 23a    | Provide a general interpretation of the results in the context of other evidence.                                                                                                                                                                                                    | Summary of findings                                            |
|                                                | 23b    | Discuss any limitations of the evidence included in the review.                                                                                                                                                                                                                      | Strength and limitations                                       |
|                                                | 23c    | Discuss any limitations of the review processes used.                                                                                                                                                                                                                                | Strength and limitations                                       |
|                                                | 23d    | Discuss implications of the results for practice, policy, and future research.                                                                                                                                                                                                       | Implications                                                   |
| <b>OTHER INFORMATION</b>                       |        |                                                                                                                                                                                                                                                                                      |                                                                |
| Registration and protocol                      | 24a    | Provide registration information for the review, including register name and registration number, or state that the review was not registered.                                                                                                                                       | Abstract                                                       |
|                                                | 24b    | Indicate where the review protocol can be accessed, or state that a protocol was not prepared.                                                                                                                                                                                       | Abstract                                                       |
|                                                | 24c    | Describe and explain any amendments to information provided at registration or in the protocol.                                                                                                                                                                                      | N/A                                                            |
| Support                                        | 25     | Describe sources of financial or non-financial support for the review, and the role of the funders or sponsors in the review.                                                                                                                                                        | Declarations                                                   |
| Competing interests                            | 26     | Declare any competing interests of review authors.                                                                                                                                                                                                                                   | Declarations                                                   |
| Availability of data, code and other materials | 27     | Report which of the following are publicly available and where they can be found: template data collection forms; data extracted from included studies; data used for all analyses; analytic code; any other materials used in the review.                                           | Declarations                                                   |

## Additional file 2. Search Strategy

Ovid MEDLINE(R) and Epub Ahead of Print, In-Process, In-Data-Review & Other Non-Indexed Citations, Daily and Versions(R) <1946 to November 17, 2021>

|    |                                                                                                                                                                            |         |
|----|----------------------------------------------------------------------------------------------------------------------------------------------------------------------------|---------|
| 1  | "routine health data*".ti,ab,kw.                                                                                                                                           | 105     |
| 2  | (routinely collected adj5 data*).ti,ab,kw.                                                                                                                                 | 4120    |
| 3  | (((healthcare adj3 data*) or health) adj3 data*).ti,ab,kw.                                                                                                                 | 67403   |
| 4  | exp Electronic Health Records/                                                                                                                                             | 24454   |
| 5  | exp Health records, Personal/                                                                                                                                              | 2305    |
| 6  | exp Medical Records Systems, Computerized/                                                                                                                                 | 44982   |
| 7  | administrative data*.ab,ti,kf. or (administrative adj5 data*).ti,ab,kw.                                                                                                    | 21725   |
| 8  | "National Program of Cancer Registries"/                                                                                                                                   | 6       |
| 9  | Registries/                                                                                                                                                                | 100425  |
| 10 | (routine adj5 data*).ti,ab,kw.                                                                                                                                             | 10955   |
| 11 | 1 or 2 or 3 or 4 or 5 or 6 or 7 or 8 or 9 or 10                                                                                                                            | 235176  |
| 12 | trial.ti,ab,kw.                                                                                                                                                            | 670298  |
| 13 | (implement* or effectiveness or efficacy or real-world or "real world" or pragmatic or evidence-based or "evidence based" or real-life or "real life" or hybrid).ti,ab,kw. | 2181529 |
| 14 | 12 and 13                                                                                                                                                                  | 220814  |
| 15 | 11 and 14                                                                                                                                                                  | 3997    |

Cochrane Library

Date of search: 17/11/2021

Results: 462 trials

| ID  | Search                                                                     |
|-----|----------------------------------------------------------------------------|
| #1  | MeSH descriptor: [Randomized Controlled Trials as Topic] explode all trees |
| #2  | MeSH descriptor: [Pragmatic Clinical Trials as Topic] explode all trees    |
| #3  | (trial):ti,ab,kw                                                           |
| #4  | MeSH descriptor: [Implementation Science] explode all trees                |
| #5  | #1 OR #2 OR #3                                                             |
| #6  | (implement*):ti,ab,kw                                                      |
| #7  | #4 OR #6                                                                   |
| #8  | #5 AND #7                                                                  |
| #9  | MeSH descriptor: [Routinely Collected Health Data] explode all trees       |
| #10 | MeSH descriptor: [Electronic Health Records] explode all trees             |
| #11 | MeSH descriptor: [Health Records, Personal] explode all trees              |
| #12 | (administrative data*):ti,ab,kw                                            |
| #13 | MeSH descriptor: [Internet of Things] explode all trees                    |
| #14 | MeSH descriptor: [Registries] explode all trees                            |
| #15 | (hospital episode data*):ti,ab,kw                                          |
| #16 | #9 OR #10 OR #11 OR #12 OR #13 OR #14 OR #15                               |
| #17 | #8 AND #16 with Publication Year from 2000 to 2021, in Trials              |

Additional file 3. Description of implementation outcomes according to Proctor et al., 2010

| <b>IMPLEMENTATION OUTCOME</b> | <b>MAY ALSO REFER TO</b>                                            | <b>DEFINITION</b>                                                                                                                                                                                                                        |
|-------------------------------|---------------------------------------------------------------------|------------------------------------------------------------------------------------------------------------------------------------------------------------------------------------------------------------------------------------------|
| <b>ACCEPTABILITY</b>          | Satisfaction                                                        | <i>The perception among implementation stakeholders that a given treatment, service, practice, or innovation is agreeable, palatable, or satisfactory.</i>                                                                               |
| <b>ADOPTION</b>               | Uptake;<br>Utilization;<br>Intention to try                         | <i>The intention, initial decision, or action to try or employ an innovation or evidence-based practice.</i>                                                                                                                             |
| <b>APPROPRIATENESS</b>        | Perceived fit;<br>Relevance;<br>Usefulness;                         | <i>The perceived fit, relevance, or compatibility of the innovation or evidence-based practice for a given practice setting, provider, or consumer; and/or perceived fit of the innovation to address a particular issue or problem.</i> |
| <b>FEASIBILITY</b>            | Actual fit;<br>Utility;<br>Practicability                           | <i>The extent to which a new treatment, or an innovation, can be successfully used or carried out within a given agency or setting.</i>                                                                                                  |
| <b>FIDELITY</b>               | Adherence;<br>Delivered as intended;<br>Quality of program delivery | <i>The degree to which an intervention was implemented as it was prescribed in the original protocol or as it was intended by the program developers</i>                                                                                 |
| <b>IMPLEMENTATION COST</b>    | Cost-effectiveness;<br>Cost-benefit                                 | <i>The cost impact of an implementation effort.</i>                                                                                                                                                                                      |
| <b>PENETRATION</b>            | Spread                                                              | <i>The integration of a practice within a service setting and its subsystems.</i>                                                                                                                                                        |
| <b>SUSTAINABILITY</b>         | Maintenance;<br>Continuation;<br>Incorporation;                     | <i>The extent to which a newly implemented treatment is maintained or institutionalized within a service setting's ongoing, stable operations.</i>                                                                                       |

Proctor E, Silmere H, Raghavan R, Hovmand P, Aarons G, Bunger A, Griffey R, Hensley M. Outcomes for implementation research: conceptual distinctions, measurement challenges, and research agenda. *Administration and policy in mental health and mental health services research*. 2011 Mar;38(2):65-76.

#### Additional file 4. References for included trials

- s1. Barr JK, Franks AL, Lee NC, et al. A randomized intervention to improve ongoing participation in mammography. *Am J Manag Care* 2001;7(9):887-94.
- s2. Wilcox SA, Koepke CP, Levenson R, et al. Registry-driven, community-based immunization outreach: a randomized controlled trial. *Am J Public Health* 2001;91(9):1507-11.
- s3. Newell SA, Sanson-Fisher RW, Girgis A, et al. Can personal health record booklets improve cancer screening behaviors? *Am J Prev Med* 2002;22(1):15-22.
- s4. Stroebel RJ, Scheitel SM, Fitz JS, et al. A Randomized Trial of Three Diabetes Registry Implementation Strategies in a Community Internal Medicine Practice. *The Joint Commission Journal on Quality Improvement* 2002;28(8):441-50.
- s5. Tierney WM, Overhage JM, Murray MD, et al. Effects of computerized guidelines for managing heart disease in primary care. *J Gen Intern Med* 2003;18(12):967-76.
- s6. Bahrami M, Deery C, Clarkson JE, et al. Effectiveness of strategies to disseminate and implement clinical guidelines for the management of impacted and unerupted third molars in primary dental care, a cluster randomised controlled trial. *Br Dent J* 2004;197(11):691-6; discussion 88.
- s7. Daley MF, Barrow J, Pearson K, et al. Identification and recall of children with chronic medical conditions for influenza vaccination. *Pediatrics* 2004;113(1 Pt 1):e26-33.
- s8. Subramanian U, Fihn SD, Weinberger M, et al. A controlled trial of including symptom data in computer-based care suggestions for managing patients with chronic heart failure. *Am J Med* 2004;116(6):375-84.
- s9. Witt K, Knudsen E, Ditlevsen S, et al. Academic detailing has no effect on prescribing of asthma medication in Danish general practice: a 3-year randomized controlled trial with 12-monthly follow-ups. *Fam Pract* 2004;21(3):248-53.
- s10. Kempe A, Daley MF, Barrow J, et al. Implementation of universal influenza immunization recommendations for healthy young children: results of a randomized, controlled trial with registry-based recall. *Pediatrics* 2005;115(1):146-54.
- s11. Stein K, Lewendon G, Jenkins R, et al. Improving uptake of cervical cancer screening in women with prolonged history of non-attendance for screening: a randomized trial of enhanced invitation methods. *J Med Screen* 2005;12(4):185-9.
- s12. Cleland JA, Hall S, Price D, et al. An exploratory, pragmatic, cluster randomised trial of practice nurse training in the use of asthma action plans. *Prim Care Respir J* 2007;16(5):311-8.
- s13. Harari D, Iliffe S, Kharicha K, et al. Promotion of health in older people: a randomised controlled trial of health risk appraisal in British general practice. *Age Ageing* 2008;37(5):565-71.
- s14. Wright A, Poon EG, Wald J, et al. Effectiveness of health maintenance reminders provided directly to patients. *AMIA Annu Symp Proc* 2008:1183.
- s15. Yano EM, Rubenstein LV, Farmer MM, et al. Targeting primary care referrals to smoking cessation clinics does not improve quit rates: implementing evidence-based interventions into practice. *Health Serv Res* 2008;43(5 Pt 1):1637-61.
- s16. Hoddinott P, Britten J, Prescott GJ, et al. Effectiveness of policy to provide breastfeeding groups (BIG) for pregnant and breastfeeding mothers in primary care: cluster randomised controlled trial. *BMJ* 2009;338:a3026.
- s17. Linder JA, Rigotti NA, Schneider LI, et al. An electronic health record-based intervention to improve tobacco treatment in primary care: a cluster-randomized controlled trial. *Arch Intern Med* 2009;169(8):781-7.

- s18. Peremans L, Rethans JJ, Verhoeven V, et al. Empowering patients or general practitioners? A randomised clinical trial to improve quality in reproductive health care in Belgium. *Eur J Contracept Reprod Health Care* 2010;15(4):280-9.
- s19. Chaney EF, Rubenstein LV, Liu CF, et al. Implementing collaborative care for depression treatment in primary care: a cluster randomized evaluation of a quality improvement practice redesign. *Implement Sci* 2011;6:121.
- s20. Krist AH, Woolf SH, Rothemich SF, et al. Interactive preventive health record to enhance delivery of recommended care: a randomized trial. *Ann Fam Med* 2012;10(4):312-9.
- s21. Amemori M, Virtanen J, Korhonen T, et al. Impact of educational intervention on implementation of tobacco counselling among oral health professionals: a cluster-randomized community trial. *Community Dent Oral Epidemiol* 2013;41(2):120-9.
- s22. Cohen AN, Chinman MJ, Hamilton AB, et al. Using patient-facing kiosks to support quality improvement at mental health clinics. *Med Care* 2013;51(3 Suppl 1):S13-20.
- s23. French SD, McKenzie JE, O'Connor DA, et al. Evaluation of a theory-informed implementation intervention for the management of acute low back pain in general medical practice: the IMPLEMENT cluster randomised trial. *PLoS One* 2013;8(6):e65471.
- s24. Green BB, Wang CY, Anderson ML, et al. An automated intervention with stepped increases in support to increase uptake of colorectal cancer screening: a randomized trial. *Ann Intern Med* 2013;158(5 Pt 1):301-11.
- s25. Kilgore ML, Outman R, Locher JL, et al. Multimodal intervention to improve osteoporosis care in home health settings: results from a cluster randomized trial. *Osteoporos Int* 2013;24(10):2555-60.
- s26. Persell SD, Lloyd-Jones DM, Friesema EM, et al. Electronic health record-based patient identification and individualized mailed outreach for primary cardiovascular disease prevention: a cluster randomized trial. *J Gen Intern Med* 2013;28(4):554-60.
- s27. Smidth M, Christensen MB, Fenger-Gron M, et al. The effect of an active implementation of a disease management programme for chronic obstructive pulmonary disease on healthcare utilization--a cluster-randomised controlled trial. *BMC Health Serv Res* 2013;13:385.
- s28. Dombkowski KJ, Costello LE, Harrington LB, et al. Age-specific strategies for immunization reminders and recalls: a registry-based randomized trial. *Am J Prev Med* 2014;47(1):1-8.
- s29. Radde K, Gottschalk A, Bussas U, et al. Invitation to cervical cancer screening does increase participation in Germany: Results from the MARZY study. *Int J Cancer* 2016;139(5):1018-30.
- s30. Taveras EM, Marshall R, Horan CM, et al. Improving children's obesity-related health care quality: process outcomes of a cluster-randomized controlled trial. *Obesity (Silver Spring)* 2014;22(1):27-31.
- s31. Mertens JR, Chi FW, Weisner CM, et al. Physician versus non-physician delivery of alcohol screening, brief intervention and referral to treatment in adult primary care: the ADVISE cluster randomized controlled implementation trial. *Addict Sci Clin Pract* 2015;10:26.
- s32. Palacio AM, Uribe C, Hazel-Fernandez L, et al. Can phone-based motivational interviewing improve medication adherence to antiplatelet medications after a coronary stent among racial minorities? A randomized trial. *J Gen Intern Med* 2015;30(4):469-75.
- s33. Sinnema H, Majo MC, Volker D, et al. Effectiveness of a tailored implementation programme to improve recognition, diagnosis and treatment of anxiety and depression in general practice: a cluster randomised controlled trial. *Implement Sci* 2015;10:33.



- s34. Forberg U, Unbeck M, Wallin L, et al. Effects of computer reminders on complications of peripheral venous catheters and nurses' adherence to a guideline in paediatric care--a cluster randomised study. *Implement Sci* 2016;11:10.
- s35. Guiriguet C, Munoz-Ortiz L, Buron A, et al. Alerts in electronic medical records to promote a colorectal cancer screening programme: a cluster randomised controlled trial in primary care. *Br J Gen Pract* 2016;66(648):e483-90.
- s36. Hemming K, Ryan R, Gill P, et al. Targeted case finding in the prevention of cardiovascular disease: a stepped wedge cluster randomised controlled trial. *Br J Gen Pract* 2016;66(651):e758-67.
- s37. Herrett E, Williamson E, van Staa T, et al. Text messaging reminders for influenza vaccine in primary care: a cluster randomised controlled trial (TXT4FLUJAB). *BMJ Open* 2016;6(2):e010069.
- s38. Lin CJ, Nowalk MP, Pavlik VN, et al. Using the 4 pillars practice transformation program to increase adult influenza vaccination and reduce missed opportunities in a randomized cluster trial. *BMC Infect Dis* 2016;16(1):623.
- s39. McDermott L, Wright AJ, Cornelius V, et al. Enhanced invitation methods and uptake of health checks in primary care: randomised controlled trial and cohort study using electronic health records. *Health Technol Assess* 2016;20(84):1-92.
- s40. Nowalk MP, Lin CJ, Pavlik VN, et al. Using the 4 Pillars Practice Transformation Program to increase adult Tdap immunization in a randomized controlled cluster trial. *Vaccine* 2016;34(41):5026-33.
- s41. Arts DL, Abu-Hanna A, Medlock SK, et al. Effectiveness and usage of a decision support system to improve stroke prevention in general practice: A cluster randomized controlled trial. *PLoS One* 2017;12(2):e0170974.
- s42. Chinman M, McCarthy S, Hannah G, et al. Using Getting To Outcomes to facilitate the use of an evidence-based practice in VA homeless programs: a cluster-randomized trial of an implementation support strategy. *Implement Sci* 2017;12(1):34.
- s43. Fitzpatrick SL, Dickins K, Avery E, et al. Effect of an obesity best practice alert on physician documentation and referral practices. *Transl Behav Med* 2017;7(4):881-90.
- s44. Hannon TS, Dugan TM, Saha CK, et al. Effectiveness of Computer Automation for the Diagnosis and Management of Childhood Type 2 Diabetes: A Randomized Clinical Trial. *JAMA Pediatr* 2017;171(4):327-34.
- s45. Liebschutz JM, Xuan Z, Shanahan CW, et al. Improving Adherence to Long-term Opioid Therapy Guidelines to Reduce Opioid Misuse in Primary Care: A Cluster-Randomized Clinical Trial. *JAMA Intern Med* 2017;177(9):1265-72.
- s46. Watkins KE, Ober AJ, Lamp K, et al. Collaborative Care for Opioid and Alcohol Use Disorders in Primary Care: The SUMMIT Randomized Clinical Trial. *JAMA Intern Med* 2017;177(10):1480-88.
- s47. Bruyndonckx R, Verhoeven V, Anthierens S, et al. The implementation of academic detailing and its effectiveness on appropriate prescribing of pain relief medication: a real-world cluster randomized trial in Belgian general practices. *Implement Sci* 2018;13(1):6.
- s48. Chak E, Taefi A, Li CS, et al. Electronic Medical Alerts Increase Screening for Chronic Hepatitis B: A Randomized, Double-Blind, Controlled Trial. *Cancer Epidemiol Biomarkers Prev* 2018;27(11):1352-57.
- s49. Coronado GD, Petrik AF, Vollmer WM, et al. Effectiveness of a Mailed Colorectal Cancer Screening Outreach Program in Community Health Clinics: The STOP CRC Cluster Randomized Clinical Trial. *JAMA Intern Med* 2018;178(9):1174-81.
- s50. Drake C, Meade C, Hull SK, et al. Integration of Personalized Health Planning and Shared Medical Appointments for Patients with Type 2 Diabetes Mellitus. *South Med J* 2018;111(11):674-82.

- s51. McClure JB, Anderson ML. Evaluation of a population-level strategy to promote tobacco treatment use among insured smokers: a pragmatic, randomized trial. *BMC Public Health* 2018;18(1):228.
- s52. Nielson CM, Rivelli JS, Fuoco MJ, et al. Effectiveness of automated and live phone reminders after mailed-FIT outreach in a pilot randomized trial. *Prev Med Rep* 2018;12:210-13.
- s53. Pallan M, Hurley KL, Griffin T, et al. A cluster-randomised feasibility trial of a children's weight management programme: the Child weight mANaGement for Ethnically diverse communities (CHANGE) study. *Pilot Feasibility Stud* 2018;4:175.
- s54. Relton C, Strong M, Thomas KJ, et al. Effect of Financial Incentives on Breastfeeding: A Cluster Randomized Clinical Trial. *JAMA Pediatr* 2018;172(2):e174523.
- s55. Svane JK, Chiou ST, Groene O, et al. A WHO-HPH operational program versus usual routines for implementing clinical health promotion: an RCT in health promoting hospitals (HPH). *Implement Sci* 2018;13(1):153.
- s56. Bauer MS, Miller CJ, Kim B, et al. Effectiveness of Implementing a Collaborative Chronic Care Model for Clinician Teams on Patient Outcomes and Health Status in Mental Health: A Randomized Clinical Trial. *JAMA Netw Open* 2019;2(3):e190230.
- s57. Gold R, Bunce A, Cowburn S, et al. Does increased implementation support improve community clinics' guideline-concordant care? Results of a mixed methods, pragmatic comparative effectiveness trial. *Implement Sci* 2019;14(1):100.
- s58. King C, Llewellyn C, Shahmanesh M, et al. Sexual risk reduction interventions for patients attending sexual health clinics: a mixed-methods feasibility study. *Health Technol Assess* 2019;23(12):1-122.
- s59. Wang SV, Rogers JR, Jin Y, et al. Stepped-wedge randomised trial to evaluate population health intervention designed to increase appropriate anticoagulation in patients with atrial fibrillation. *BMJ Qual Saf* 2019;28(10):835-42.
- s60. Cai Y, Gong W, He H, et al. Mobile Texting and Lay Health Supporters to Improve Schizophrenia Care in a Resource-Poor Community in Rural China (LEAN Trial): Randomized Controlled Trial Extended Implementation. *J Med Internet Res* 2020;22(12):e22631.
- s61. Ivers NM, Schwalm JD, Bouck Z, et al. Interventions supporting long term adherence and decreasing cardiovascular events after myocardial infarction (ISLAND): pragmatic randomised controlled trial. *BMJ* 2020;369:m1731.
- s62. Japuntich SJ, Hammett PJ, Rogers ES, et al. Effectiveness of Proactive Tobacco Cessation Treatment Outreach Among Smokers With Serious Mental Illness. *Nicotine Tob Res* 2020;22(9):1433-38.
- s63. Kapoor A, Amroze A, Vakil F, et al. SUPPORT-AF II: Supporting Use of Anticoagulants Through Provider Profiling of Oral Anticoagulant Therapy for Atrial Fibrillation: A Cluster-Randomized Study of Electronic Profiling and Messaging Combined With Academic Detailing for Providers Making Decisions About Anticoagulation in Patients With Atrial Fibrillation. *Circ Cardiovasc Qual Outcomes* 2020;13(2):e005871.
- s64. Lipscomb J, Escoffery C, Gillespie TW, et al. Improving Screening Uptake among Breast Cancer Survivors and Their First-Degree Relatives at Elevated Risk to Breast Cancer: Results and Implications of a Randomized Study in the State of Georgia. *Int J Environ Res Public Health* 2020;17(3).
- s65. Lum HD, Dukes J, Daddato AE, et al. Effectiveness of Advance Care Planning Group Visits Among Older Adults in Primary Care. *J Am Geriatr Soc* 2020;68(10):2382-89.
- s66. Lowery JT, Horick N, Kinney AY, et al. A randomized trial to increase colonoscopy screening in members of high-risk families in the colorectal cancer family registry and cancer genetics network. *Cancer Epidemiol Biomarkers Prev* 2014;23(4):601-10.

- s67. Moen KA, Kumar B, Igland J, et al. Effect of an Intervention in General Practice to Increase the Participation of Immigrants in Cervical Cancer Screening: A Cluster Randomized Clinical Trial. *JAMA Netw Open* 2020;3(4):e201903.
- s68. Peralta CA, Frigaard M, Rolon L, et al. Screening for CKD To Improve Processes of Care among Nondiabetic Veterans with Hypertension: A Pragmatic Cluster-Randomized Trial. *Clin J Am Soc Nephrol* 2020;15(2):174-81.
- s69. Sabo RT, Etz RS, Gonzalez MM, et al. Low-Intensity Intervention Supports Diabetes Registry Implementation: A Cluster-Randomized Trial in the Ambulatory Care Outcomes Research Network (ACORN). *J Am Board Fam Med* 2020;33(5):728-35.
- s70. Shimada SL, Zocchi MS, Hogan TP, et al. Impact of Patient-Clinical Team Secure Messaging on Communication Patterns and Patient Experience: Randomized Encouragement Design Trial. *J Med Internet Res* 2020;22(11):e22307.
- s71. Szilagyi PG, Albertin C, Casillas A, et al. Effect of Patient Portal Reminders Sent by a Health Care System on Influenza Vaccination Rates: A Randomized Clinical Trial. *JAMA Intern Med* 2020;180(7):962-70.
- s72. Wijesundara JG, Ito Fukunaga M, Ogarek J, et al. Electronic Health Record Portal Messages and Interactive Voice Response Calls to Improve Rates of Early Season Influenza Vaccination: Randomized Controlled Trial. *J Med Internet Res* 2020;22(9):e16373.
- s73. Willis TA, Collinson M, Glidewell L, et al. An adaptable implementation package targeting evidence-based indicators in primary care: A pragmatic cluster-randomised evaluation. *PLoS Med* 2020;17(2):e1003045.
- s74. Dahne J, Player M, Carpenter MJ, et al. Evaluation of a Proactive Smoking Cessation Electronic Visit to Extend the Reach of Evidence-Based Cessation Treatment via Primary Care. *Telemed J E Health* 2021;27(3):347-54.
- s75. Dzikowska M, Lee KSK, Conigrave JH, et al. Support for Aboriginal health services in reducing harms from alcohol: 2-year service provision outcomes in a cluster randomized trial. *Addiction* 2021;117(3):796-803.
- s76. Gengiah S, Barker PM, Yende-Zuma N, et al. A cluster-randomized controlled trial to improve the quality of integrated HIV-tuberculosis services in primary healthcareclinics in South Africa. *J Int AIDS Soc* 2021;24(9):e25803.
- s77. Hirsch-Moverman Y, Howard AA, Mantell JE, et al. Improving child tuberculosis contact identification and screening in Lesotho: Results from a mixed-methods cluster-randomized implementation science study. *PLoS One* 2021;16(5):e0248516.
- s78. Howie AH, Klar N, Nash DM, et al. Printed educational materials directed at Ontario family physicians do not improve adherence to guideline recommendations for diabetes management: a pragmatic, factorial, cluster randomized controlled trial [ISRCTN72772651]. *BMC Fam Pract* 2021;22(1):243.
- s79. Schneider JA, Young L, Ramachandran A, et al. A Pragmatic Randomized Controlled Trial to Increase PrEP Uptake for HIV Prevention: 55-Week Results From PrEPChicago. *J Acquir Immune Defic Syndr* 2021;86(1):31-37.
- s80. Webster R, Usherwood T, Joshi R, et al. An electronic decision support-based complex intervention to improve management of cardiovascular risk in primary health care: a cluster randomised trial (INTEGRATE). *Med J Aust* 2021;214(9):420-27.

Additional file 5. Summary of single implementation strategies used in included trials

| Single Implementation strategy                                                              | Total = 24 | N (%)   |
|---------------------------------------------------------------------------------------------|------------|---------|
| Reminders                                                                                   | 16         | (66.7%) |
| Education (including meetings, materials, trainings, workshops, educational outreach, etc.) | 5          | (20.8%) |
| CDSS                                                                                        | 3          | (12.5%) |

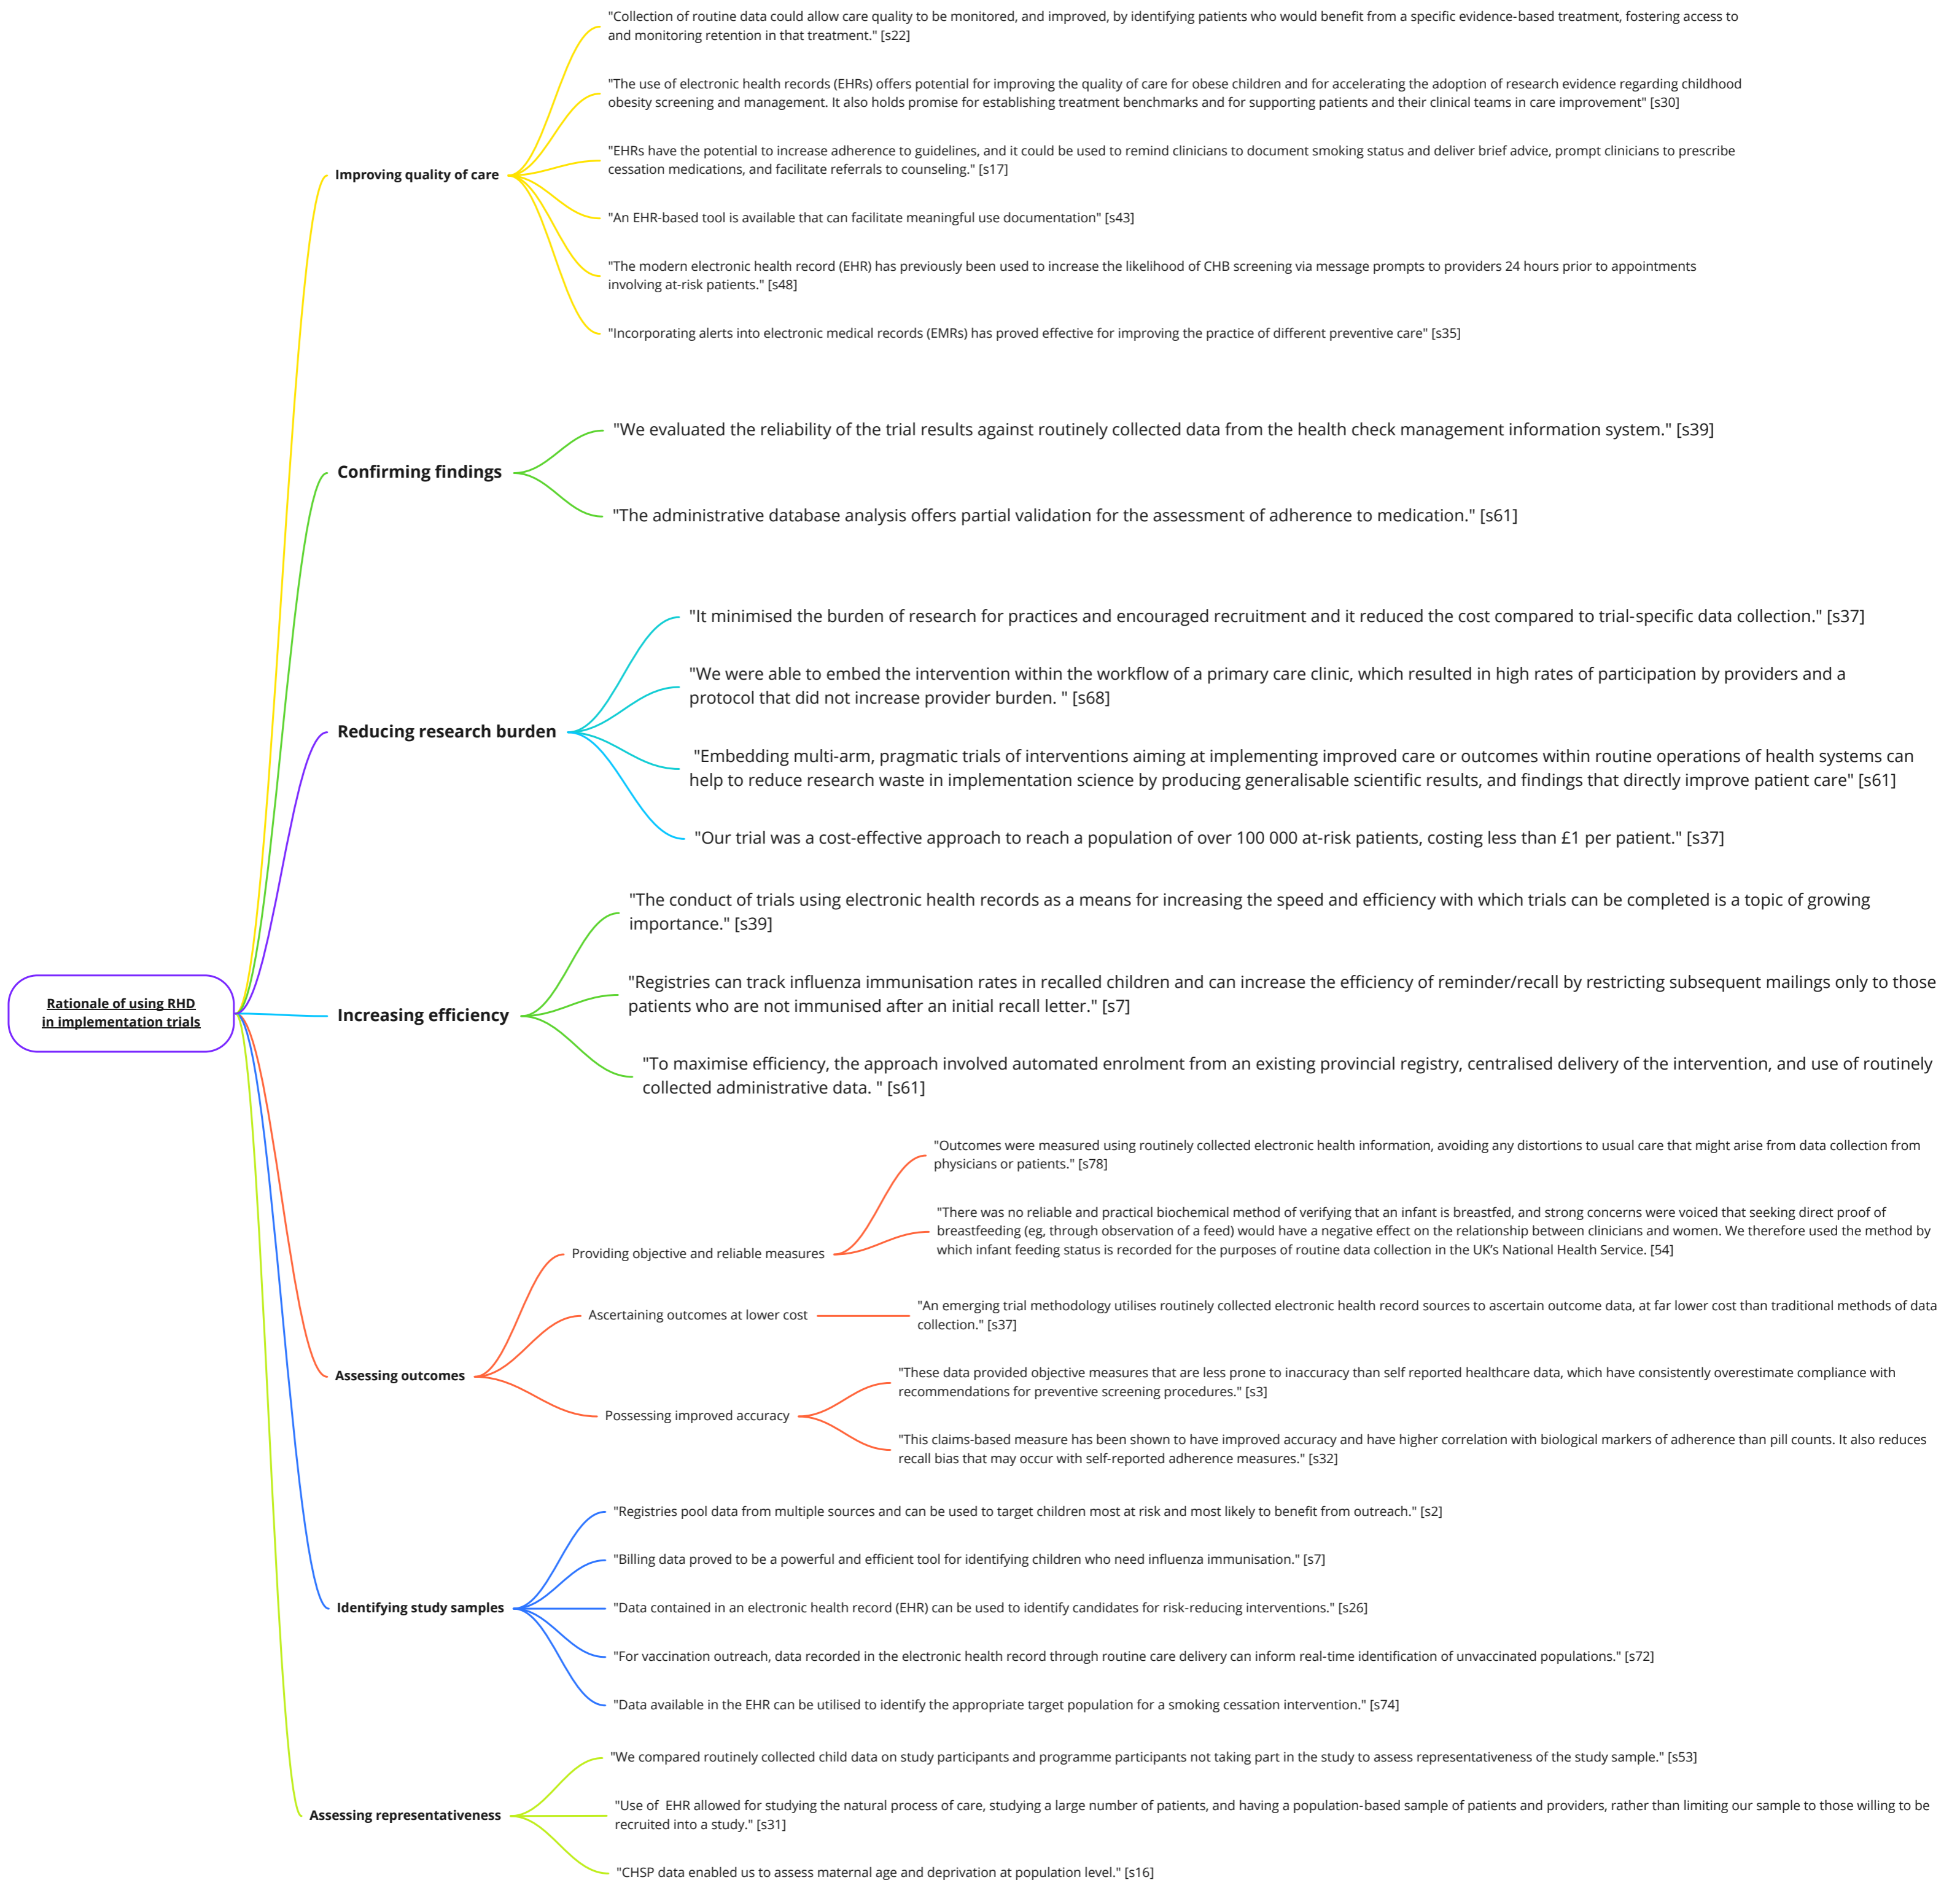

# Additional file 7. Reported facilitators and barriers with full examples

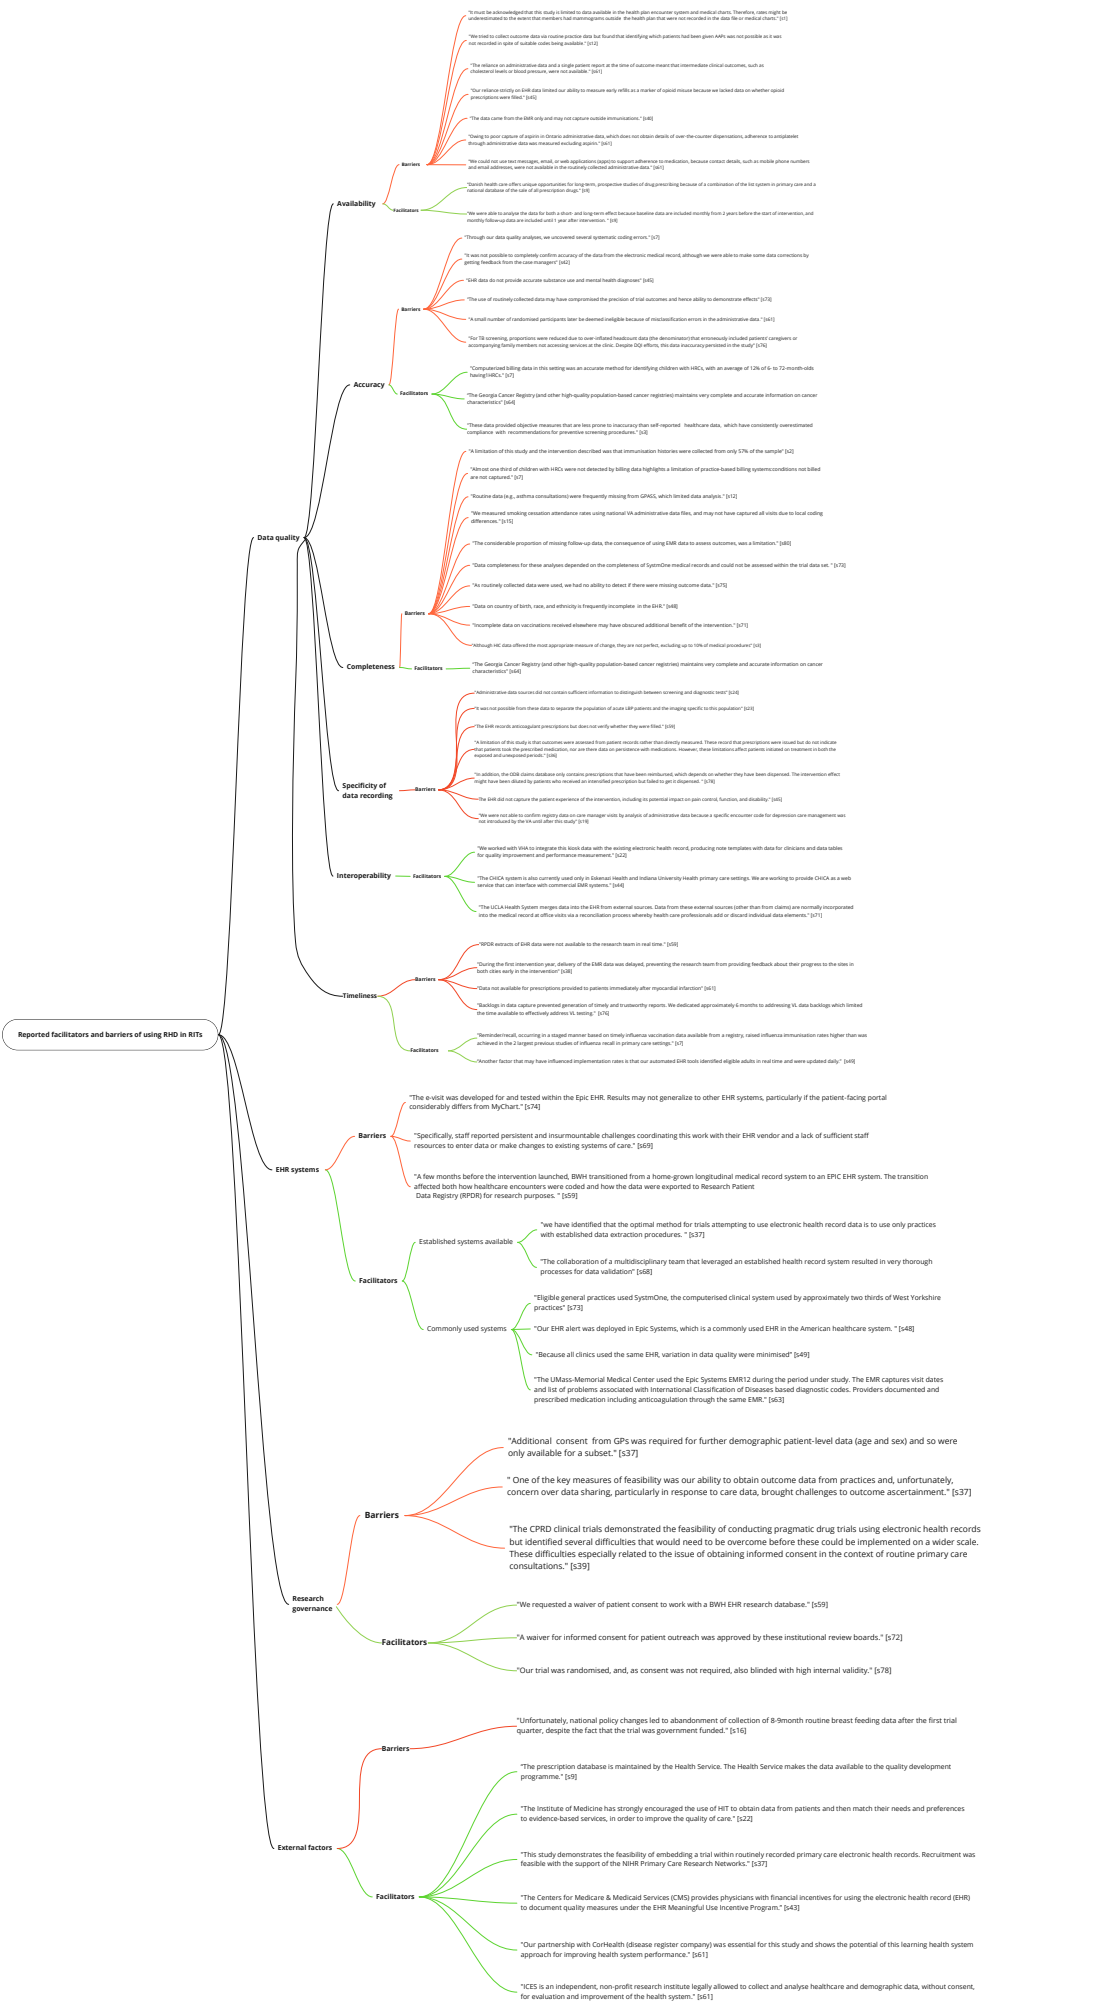

Supplement: 13012_2023_1300_MOESM1_ESM.pdf [file 13012_2023_1300_MOESM1_ESM.pdf]
